# Supplementary material for: The conformational bias of aryl, arylsulfonyl geminally substituted tertiary carbon centers: applications in substrate-based stereocontrol
Source: Royal Society of Chemistry journal article supplement (doi:10.1039/b601647b), 2006-01-01

**The Conformational Bias of Aryl, Arylsulfonyl Geminally Substituted Tertiary Carbon Centers: Applications in Substrate-Based Stereocontrol**

Jeremy P. Scott,<sup>\*</sup> † Peter R. Mullens,<sup>†</sup> Sarah E. Brewer,<sup>†</sup> Karel M. J. Brands,<sup>†</sup> Jennifer R. Chilenski,<sup>‡</sup> Antony J. Davies,<sup>†</sup> Andrew D. Gibb,<sup>†</sup> David R. Lieberman,<sup>†</sup> Steven F. Oliver<sup>†</sup> and Ulf-H. Dolling<sup>‡</sup>

<sup>†</sup>*Department of Process Research, Merck Sharp & Dohme Research Laboratories, Hertford Road, Hoddesdon, Hertfordshire, EN11 9BU and* <sup>‡</sup>*Department of Process Research, Merck Research Laboratories, P.O. BOX 2000, Rahway, New Jersey 07065.*

*jeremy\_scott@merck.com*

**Supporting Information**

All reactions were carried out under a nitrogen atmosphere. All solvents and reagents were purchased from commercial sources and were used without further purification. <sup>1</sup>H and <sup>13</sup>C NMR were recorded on a Bruker 400 MHz instrument with chemical shifts reported relative to residual proton solvent peaks. Melting points (open capillary) were performed on a Stuart Scientific SMP3 apparatus and are uncorrected. Crystallographic data for **2** and **4** have been deposited at the Cambridge Crystallographic Data Centre. These data can be obtained free of charge via [www.ccdc.cam.ac.uk/data-request/cif](http://www.ccdc.cam.ac.uk/data-request/cif), by emailing [data\\_request@ccdc.cam.ac.uk](mailto:data_request@ccdc.cam.ac.uk), or by contacting The Cambridge Crystallographic Data Centre, 12 Union Road, Cambridge CB2 1EZ, UK; fax: +44 1223 336033.

Single crystal X-ray structures:

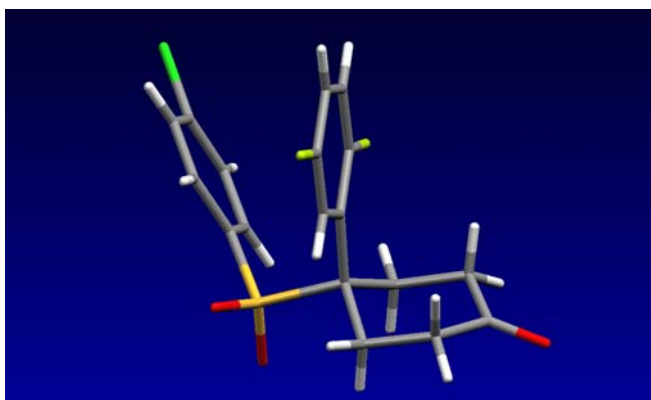

Cyclohexanone **2** (CCDC 236716)

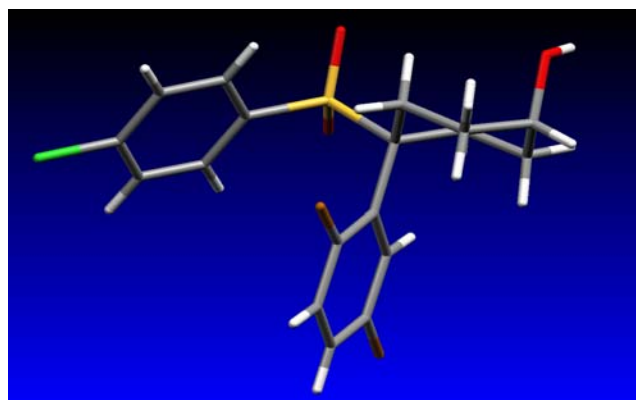

*Cis* cyclohexanol **4** (CCDC XXXXXX)

**Crystal data and structural refinement for cyclohexanone 2.** A single crystal was grown from IPAc/heptane (Mpt 449-451 K) was selected for single crystal x-ray data collection on a Bruker Smart Apex system. The crystals were colorless polyhedron with dimensions of 0.44 mm x 0.30 mm x 0.05 mm. The unit cell was collected on 10 second scan rate and manual indexing gave the cell setting to be orthorhombic. The structure was solved in the orthorhombic Pca2(1) space group after a quadrant of data collection using 10 second scan rate.

|                                   |                                                                    |                         |
|-----------------------------------|--------------------------------------------------------------------|-------------------------|
| Identification code               | jrc0831n                                                           |                         |
| Empirical formula                 | C <sub>18</sub> H <sub>15</sub> Cl F <sub>2</sub> O <sub>3</sub> S |                         |
| Formula weight                    | 384.81                                                             |                         |
| Temperature                       | 298(2) K                                                           |                         |
| Wavelength                        | 0.71073 Å                                                          |                         |
| Crystal system, space group       | Orthorhombic,                                                      | Pca2(1)                 |
| Unit cell dimensions              | a = 15.450(10) Å                                                   | alpha = 90 deg.         |
|                                   | b = 10.490(7) Å                                                    | beta = 90 deg.          |
|                                   | c = 10.828(7) Å                                                    | gamma = 90 deg.         |
| Volume                            | 1755(2) Å <sup>3</sup>                                             |                         |
| Z, Calculated density             | 4,                                                                 | 1.456 Mg/m <sup>3</sup> |
| Absorption coefficient            | 0.371 mm <sup>-1</sup>                                             |                         |
| F(000)                            | 792                                                                |                         |
| Crystal size                      | 0.44 x 0.30 x 0.05 mm                                              |                         |
| Theta range for data collection   | 1.94 to 26.47 deg.                                                 |                         |
| Limiting indices                  | -19<=h<=19,<br>-12<=k<=13,<br>-12<=l<=13                           |                         |
| Reflections collected / unique    | 13312 / 3373 [R(int) = 0.1182]                                     |                         |
| Completeness to theta = 26.47     | 99.6 %                                                             |                         |
| Absorption correction             | None                                                               |                         |
| Refinement method                 | Full-matrix least-squares on F <sup>2</sup>                        |                         |
| Data / restraints / parameters    | 3373 / 1 / 226                                                     |                         |
| Goodness-of-fit on F <sup>2</sup> | 0.957                                                              |                         |
| Final R indices [I>2sigma(I)]     | R1 = 0.0515,                                                       | wR2 = 0.1173            |
| R indices (all data)              | R1 = 0.0622,                                                       | wR2 = 0.1225            |

|                              |                                    |
|------------------------------|------------------------------------|
| Absolute structure parameter | -0.01(9)                           |
| Largest diff. peak and hole  | 0.303 and -0.172 e.Å <sup>-3</sup> |

**Crystal data and structure refinement for cis cyclohexanol 4.** Crystals were grown by evaporation of an acetonitrile solution of **4**. Mpt 456-457 K. The unit cell dimensions are a=6.932 Å; b=8.4366 Å; c=29.3225 Å; alpha=90°; beta=92.74°; gamma=90° with a unit cell volume of 1706.1 Å<sup>3</sup>. A single crystal was selected for single crystal x-ray data collection on a Bruker Smart Apex CCD system at low temperature (-50°C). The crystal was a colorless polyhedron with dimensions of 0.360 mm x 0.225 mm x 0.130 mm. The unit cell was collected on 5 second scan rate and auto indexing gave the cell setting to be monoclinic P. The structure was solved in the monoclinic P 2<sub>1</sub>/c space group after a quadrant data collection using 5 second scan rate.

|                                 |                                                                    |                         |
|---------------------------------|--------------------------------------------------------------------|-------------------------|
| Identification code             | jrc2573n                                                           |                         |
| Empirical formula               | C <sub>18</sub> H <sub>17</sub> Cl F <sub>2</sub> O <sub>3</sub> S |                         |
| Formula weight                  | 386.83                                                             |                         |
| Temperature                     | 223(2) K                                                           |                         |
| Wavelength                      | 0.71073 Å                                                          |                         |
| Crystal system, space group     | Monoclinic,                                                        | P 2 <sub>1</sub> /c     |
| Unit cell dimensions            | a = 6.9274(5) Å                                                    | alpha = 90 deg.         |
|                                 | b = 8.4158(6) Å                                                    | beta = 92.7430(10) deg. |
|                                 | c = 29.301(2) Å                                                    | gamma = 90 deg.         |
| Volume                          | 1706.3(2) Å <sup>3</sup>                                           |                         |
| Z, Calculated density           | 4,                                                                 | 1.506 Mg/m <sup>3</sup> |
| Absorption coefficient          | 0.382 mm <sup>-1</sup>                                             |                         |
| F(000)                          | 800                                                                |                         |
| Crystal size                    | 0.36 x 0.225 x 0.13 mm                                             |                         |
| Theta range for data collection | 1.39 to 26.41 deg.                                                 |                         |
| Limiting indices                | -8<=h<=8,<br>-10<=k<=10,<br>-36<=l<=36                             |                         |
| Reflections collected / unique  | 17593 / 3513 [R(int) = 0.0271]                                     |                         |
| Completeness to theta = 26.41   | 99.8 %                                                             |                         |
| Absorption correction           | None                                                               |                         |
| Refinement method               | Full-matrix least-squares on F <sup>2</sup>                        |                         |

|                                   |                                    |              |
|-----------------------------------|------------------------------------|--------------|
| Data / restraints / parameters    | 3513 / 0 / 227                     |              |
| Goodness-of-fit on F <sup>2</sup> | 1.041                              |              |
| Final R indices [I>2sigma(I)]     | R1 = 0.0401,                       | wR2 = 0.1009 |
| R indices (all data)              | R1 = 0.0472,                       | wR2 = 0.1054 |
| Largest diff. peak and hole       | 0.413 and -0.208 e.A <sup>-3</sup> |              |

**Major diastereomer:** *Cis*-5-(Phenylsulfonyl)-

3,3a,4,5,6,7-hexahydro-2,1-benzisoxazole (**9**). <sup>1</sup>H NMR (400 MHz, C<sub>6</sub>D<sub>6</sub>) δ 7.72-7.68 (m, 2 x ArH), 7.03-6.93 (m, 3 x ArH), 3.89 (dd, *J* = 8.3, 10.4 Hz, 3-H<sub>A</sub>), 3.22 (dd, 1H, *J* = 8.3, 10.3 Hz, 3-H<sub>B</sub>), 2.51 (m, H<sub>6</sub>), 2.43-2.36 (m, 8-H<sub>eq</sub>), 2.22-2.11 (m, 4-H). 2.05-1.98 (m, 1H, 5-H<sub>eq</sub>), 1.91-1.84 (m, 7-H<sub>eq</sub>), 1.35 (ddt, *J* = 1.2, 5.2, 13.4

Hz, 8-H<sub>ax</sub>), 1.32-1.17 (m, 7-H<sub>ax</sub>), 1.16-1.06 (m, 5-H<sub>ax</sub>). <sup>13</sup>C NMR (100 MHz, C<sub>6</sub>D<sub>6</sub>) δ 156.1 (C<sub>9</sub>), 137.8 (C<sub>10</sub>), 133.5 (C<sub>13</sub>), 129.2 (C<sub>11</sub>), 129.1 (C<sub>12</sub>), 73.0 (C<sub>3</sub>), 61.2 (C<sub>6</sub>), 46.7 (C<sub>4</sub>), 30.9 (C<sub>5</sub>), 25.8 (C<sub>7</sub>), 22.9 (C<sub>8</sub>). Red arrows indicate nOe contacts which confirm *cis* relative stereochemistry of major diastereomer.

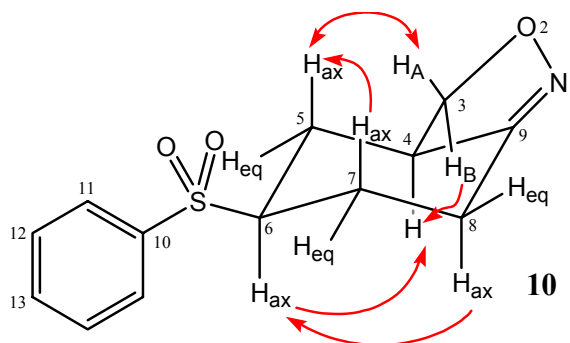

**Minor diastereomer:** *Trans*-5-(Phenylsulfonyl)-3,3a,4,5,6,7-

hexahydro-2,1-benzisoxazole (**10**). <sup>1</sup>H NMR (400 MHz, CDCl<sub>3</sub>) δ 7.95-7.92 (m, 2 x 11-H), 7.74-7.68 (m, 13-H), 7.66-7.58 (m, 2 x 12-H), 4.56 (dd, *J* = 8.0, 10.4 Hz, 3-H<sub>A</sub>), 4.03-3.91 (m, 4-H), 3.77 (dd, *J* = 8.0, 9.8 Hz, 3-H<sub>B</sub>), 3.35-3.30 (m, 6-H), 2.96 (dt, *J* = 14.0, 5.7 Hz, 8-H<sub>A</sub>), 2.79-2.68 (m, 5-H<sub>A</sub> and 8-H<sub>B</sub>), 2.49-2.41 (m, 7-H<sub>A</sub>), 1.87-1.80 (m, 1H, 7-H<sub>B</sub>), 1.80-1.70 (m, 5-H<sub>B</sub>); <sup>13</sup>C NMR

(100 MHz, CDCl<sub>3</sub>) δ 158.3 (C<sub>9</sub>), 137.7 (C<sub>10</sub>), 134.1 (C<sub>13</sub>), 129.5 (C<sub>11</sub>), 128.4 (C<sub>12</sub>), 73.7 (C<sub>3</sub>), 58.4 (C<sub>6</sub>), 43.9 (C<sub>4</sub>), 30.2 (C<sub>5</sub>), 24.9 (C<sub>7</sub>), 20.7 (C<sub>8</sub>); mp 155-156 °C; HRMS (ES) Calcd. for C<sub>13</sub>H<sub>16</sub>NO<sub>3</sub>S (M + H) 266.0851. Found 266.0844. Red arrows indicate observed nOe contacts which confirm relative stereochemistry.

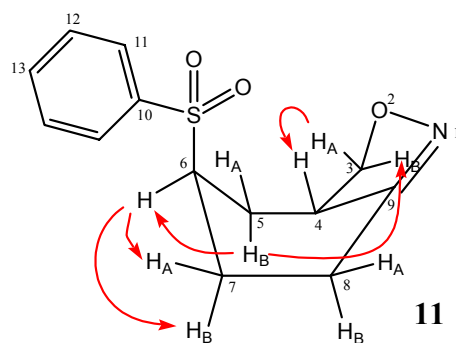

*cis*-5-Phenyl-5-(2,5-difluorophenylsulfonyl)-3,3a,4,5,6,7-hexahydro-2,1-benzisoxazole (**14**).  $^1\text{H}$  NMR (600.1 MHz,  $d_7$ -DMF, 350K)  $\delta$  7.77 (m, 19-H), 7.58 (m, 2 x 18-H), 7.52 (m, 2 x 17-H), 7.35-7.30 (om, 13-H, 15-H), 7.16 (ddd,  $J = 13.6, 9.1, 4.9$  Hz, 12-H), 4.50 (dd,  $J = 9.8, 7.9$  Hz, 3- $\text{H}_\text{A}$ ), 3.87 (dd,  $J = 10.2, 7.9$  Hz, 3- $\text{H}_\text{B}$ ), 3.32-3.22 (om, 4-H, 5- $\text{H}_\text{eq}$ ), 3.17 (m, 7- $\text{H}_\text{eq}$ ), 2.84 (m, 8- $\text{H}_\text{eq}$ ), 2.23-2.15 (om, 7- $\text{H}_\text{ax}$ , 8- $\text{H}_\text{ax}$ ), 2.09 (td,  $J = 12.5, 1.9$  Hz, 5- $\text{H}_\text{ax}$ ). Red arrows indicate observed nOe contacts.

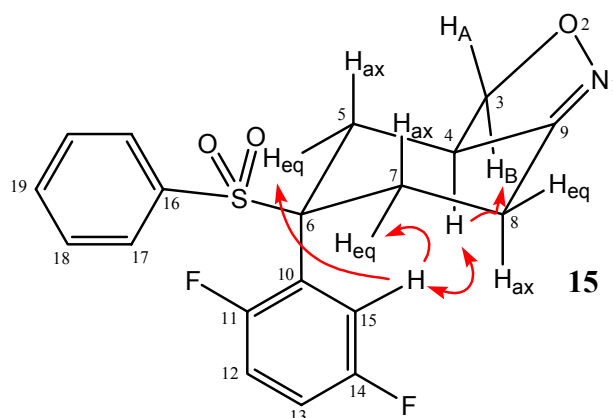

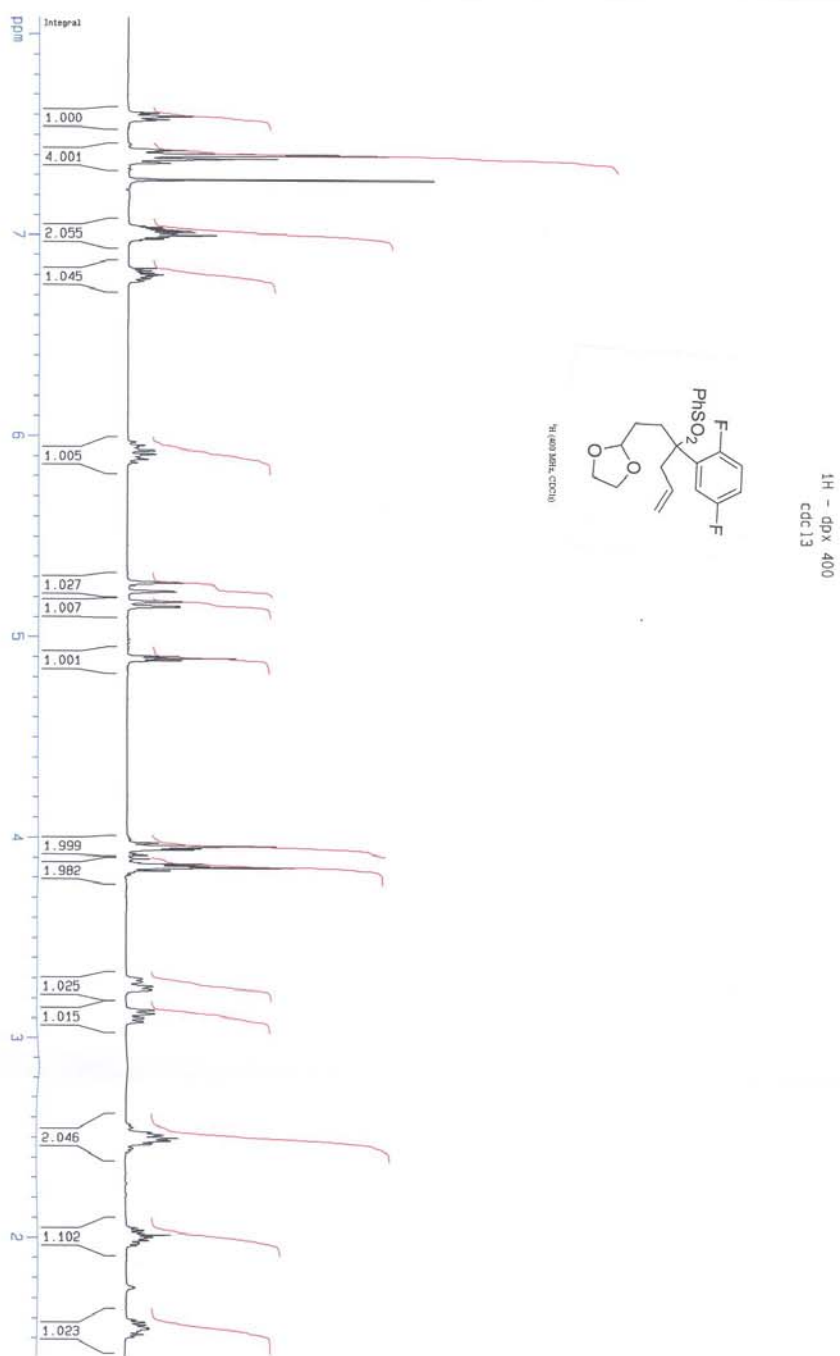

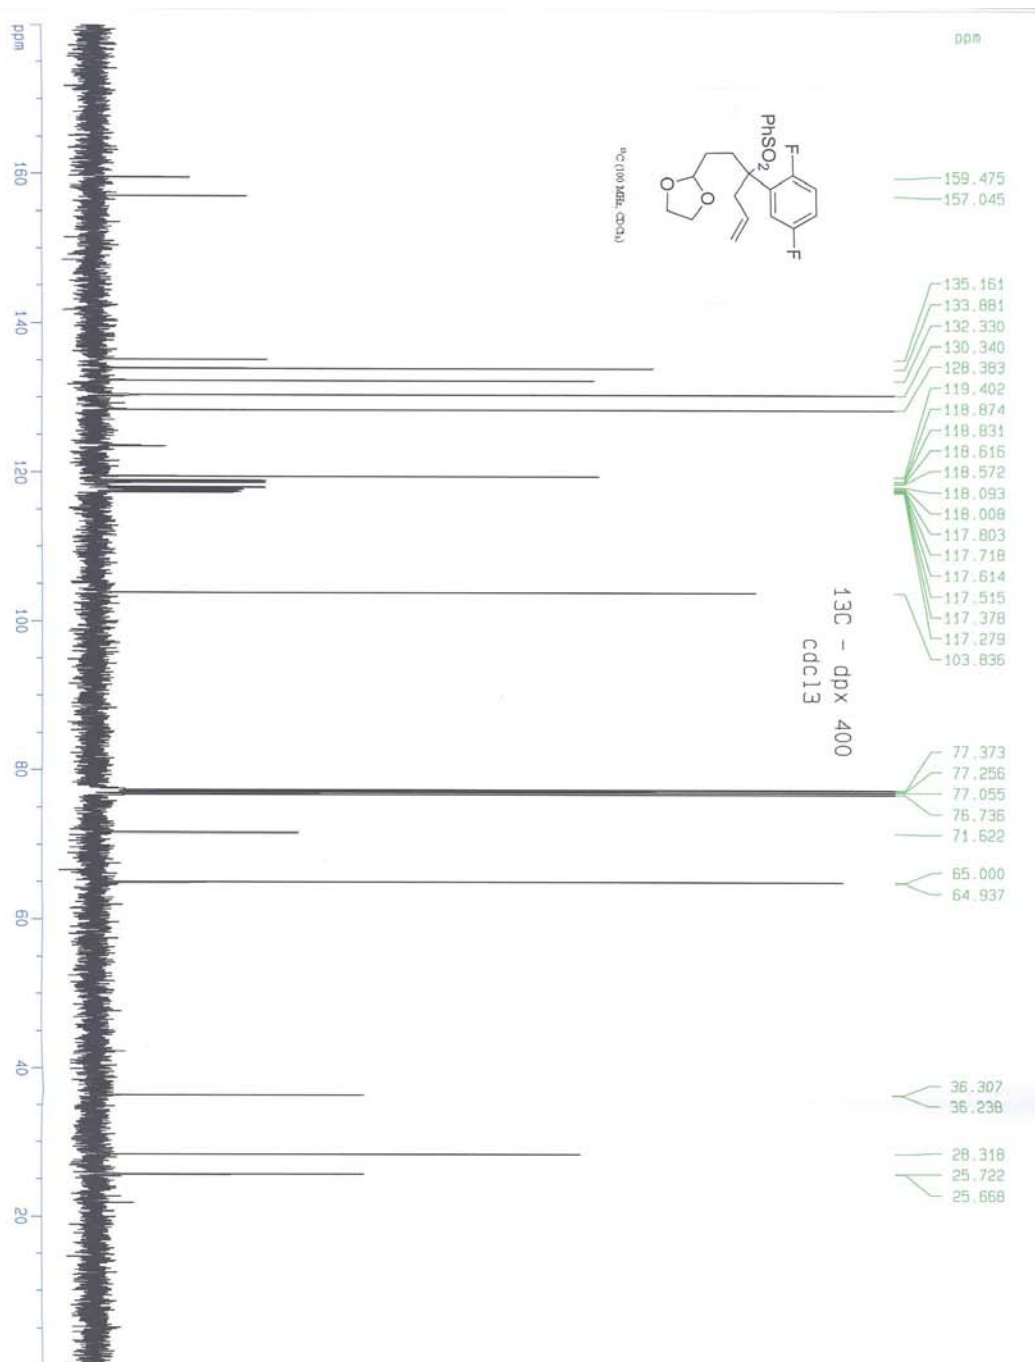

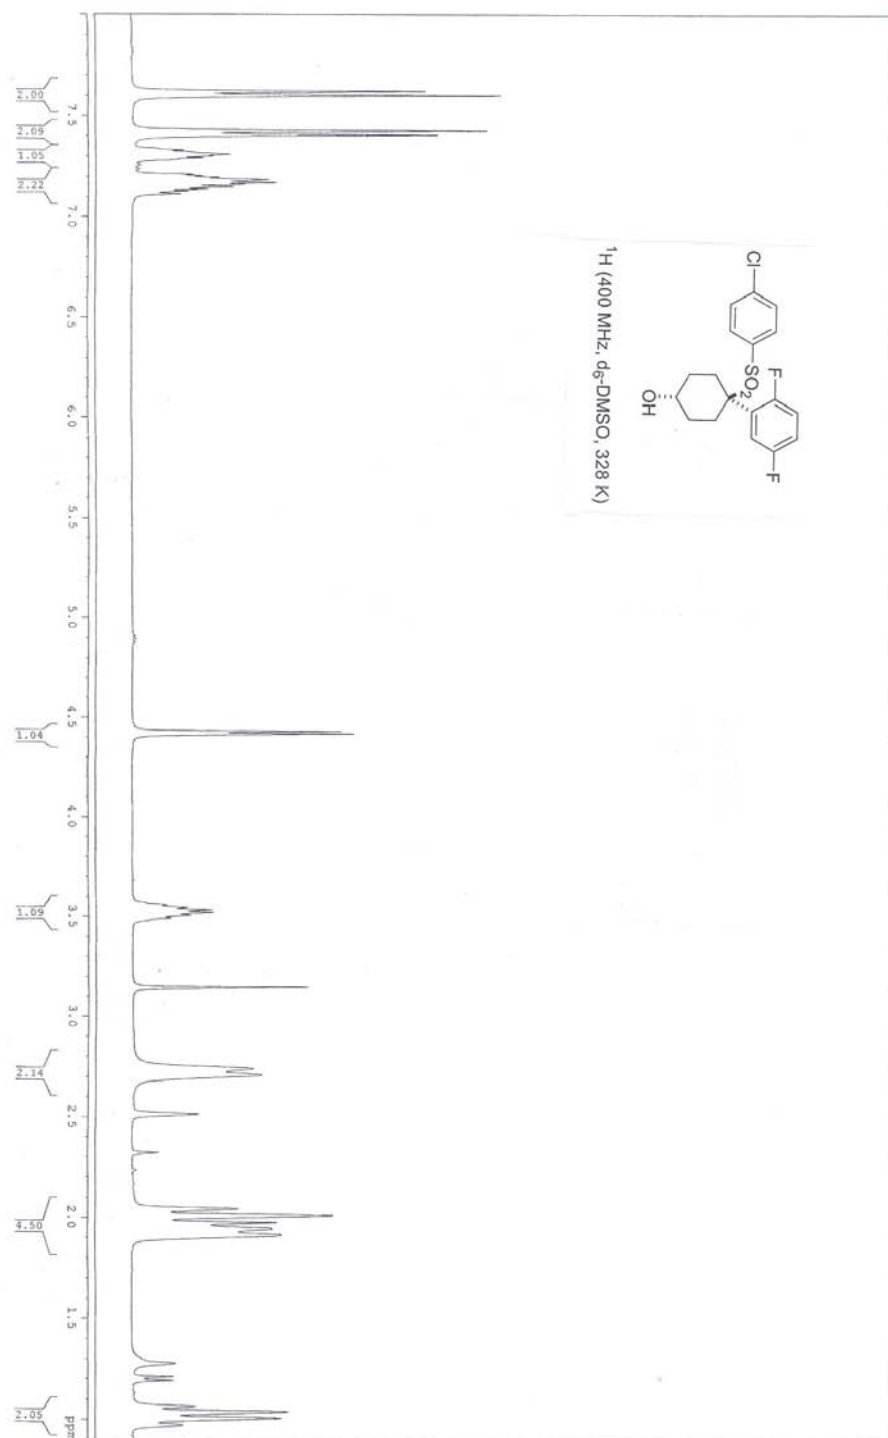



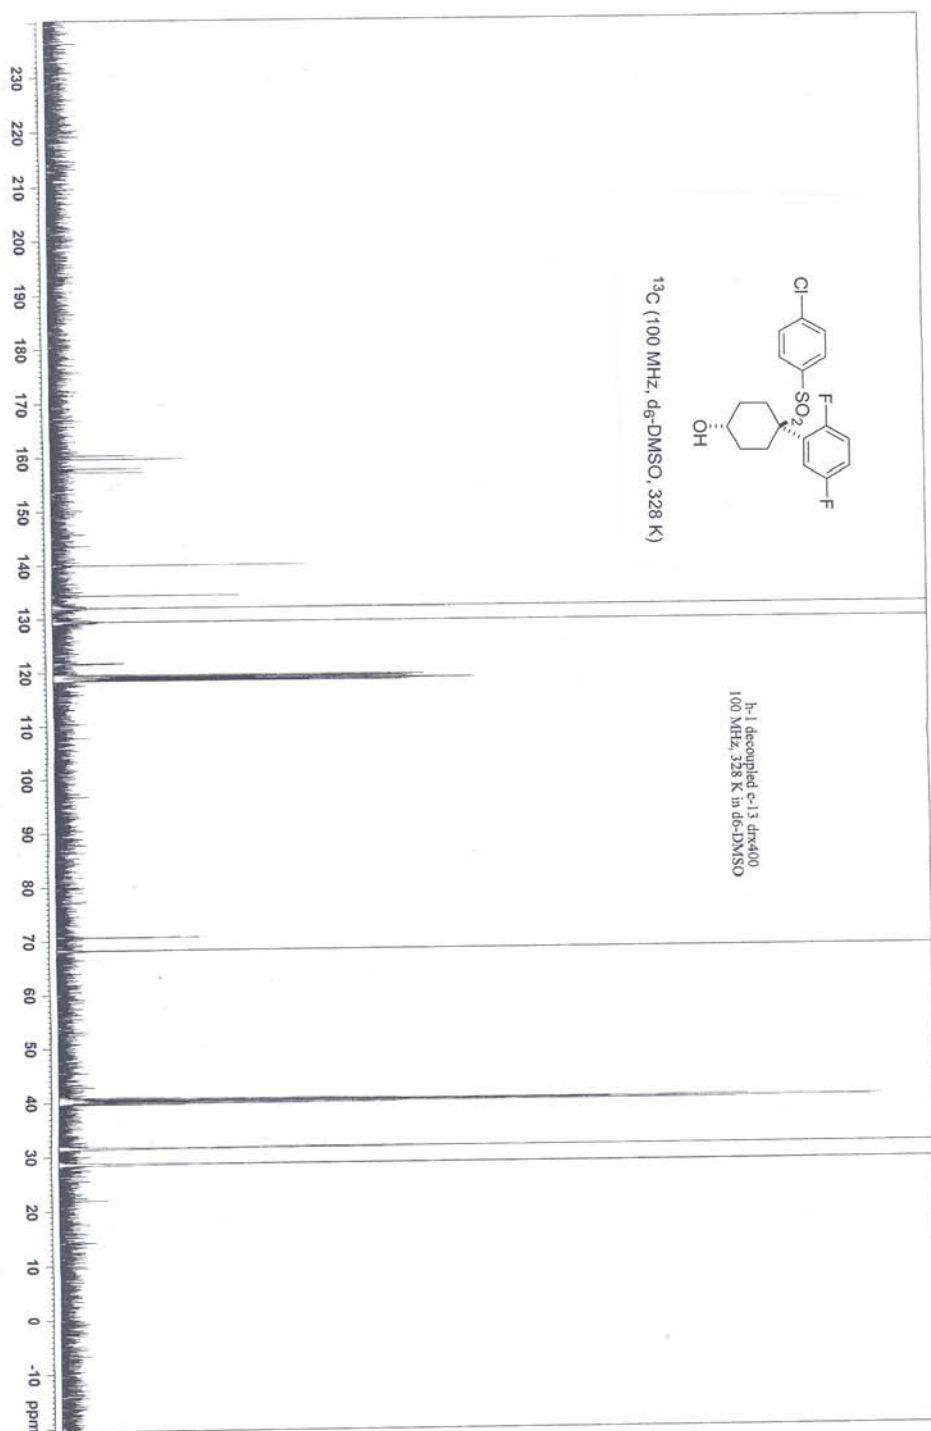

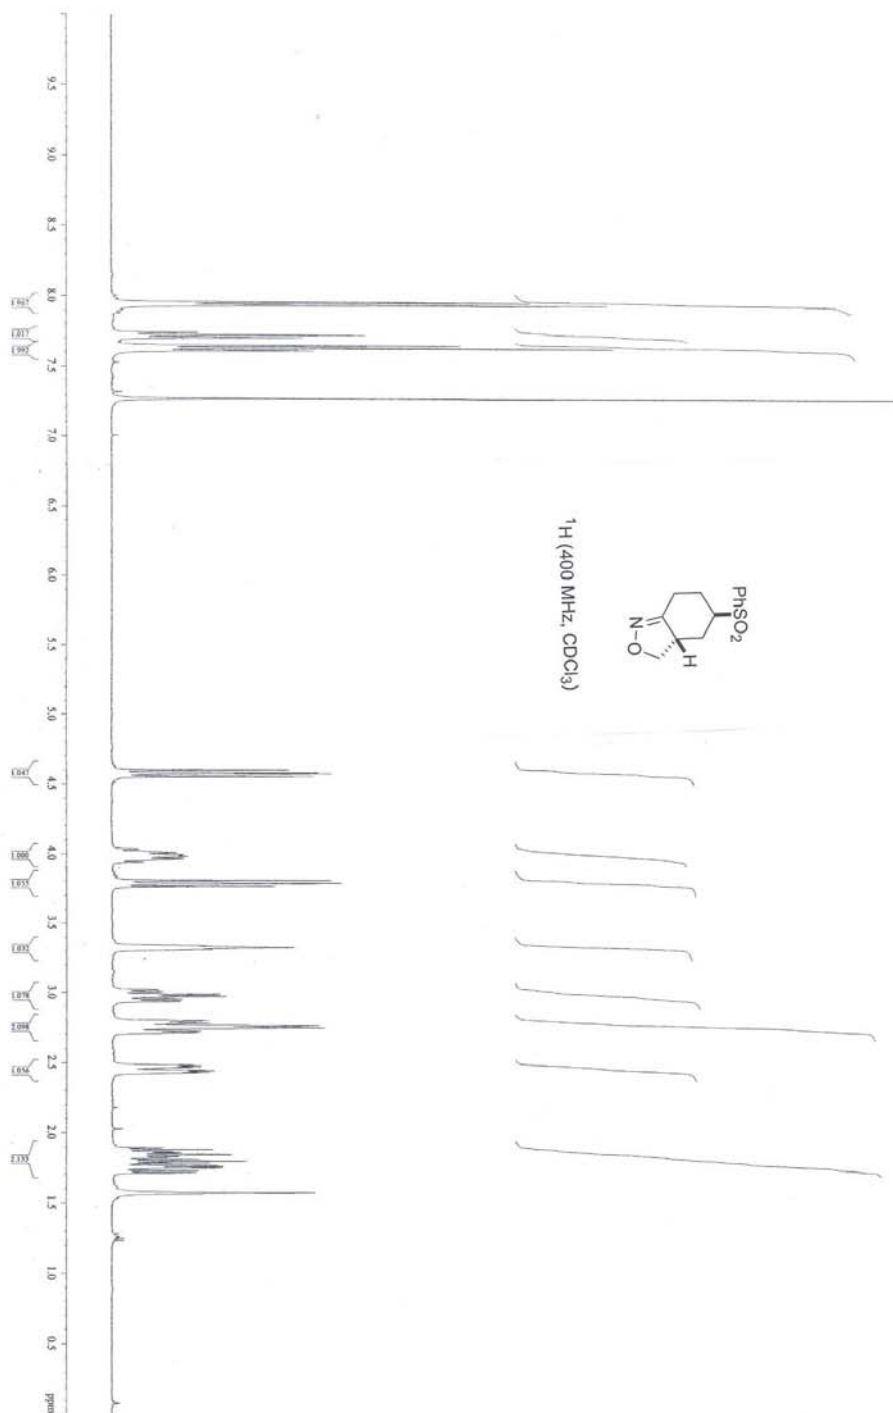

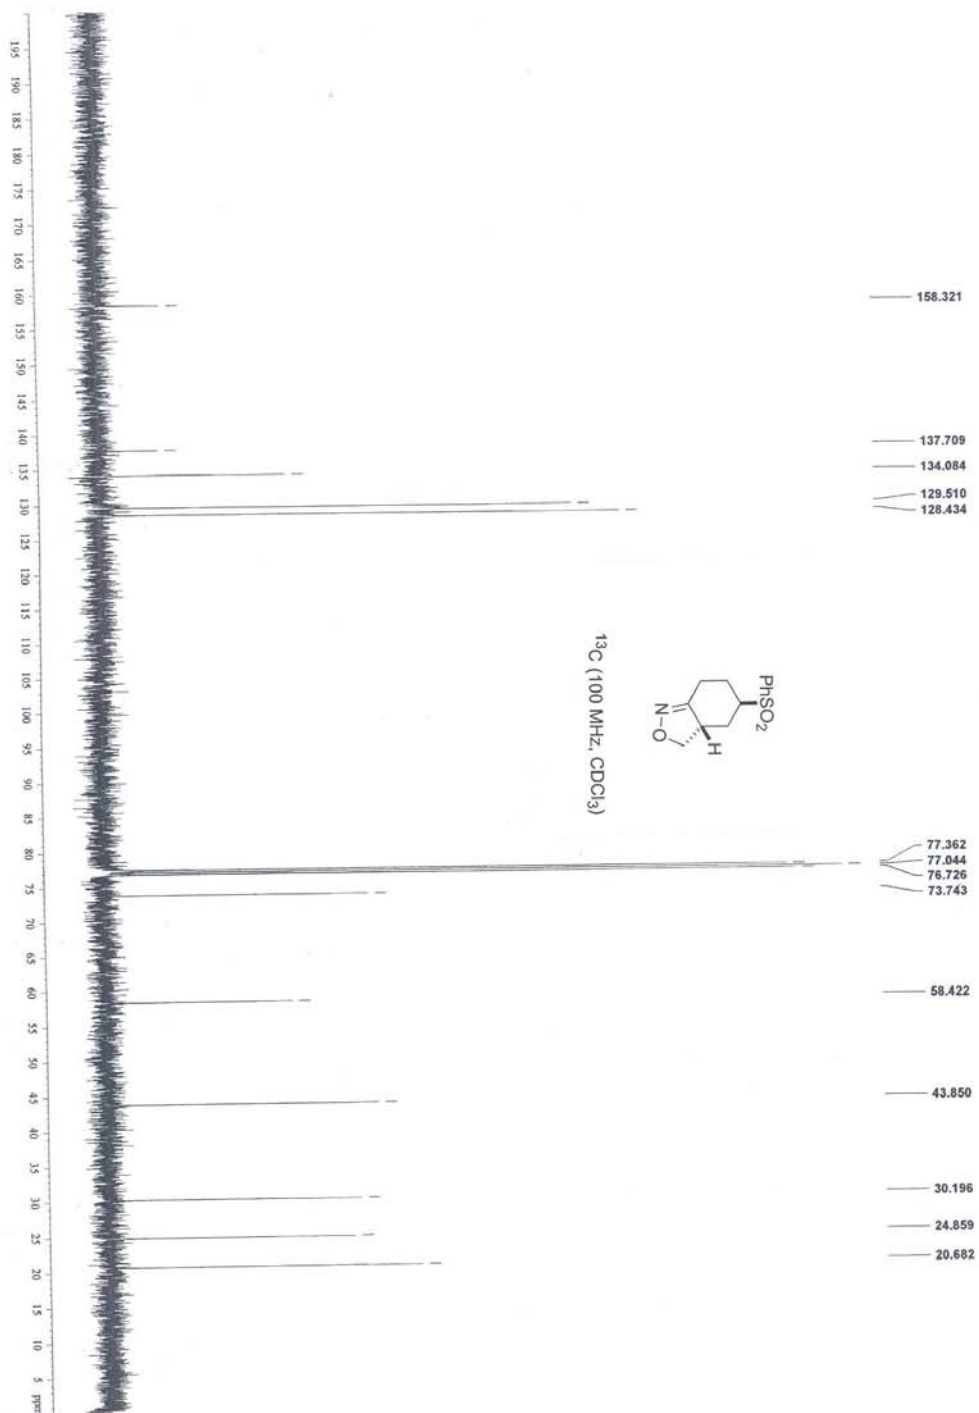

Supplement: b601647b.pdf [file b601647b.pdf]
